# Supplementary material for: Consequences of chirality on the dynamics of a water-soluble supramolecular polymer
Source: PubMed Central journal article supplement (PMC4346625; doi:10.1038/ncomms7234), 2015-02-20
Supplement: ncomms7234-s1.pdf [file ncomms7234-s1.pdf]

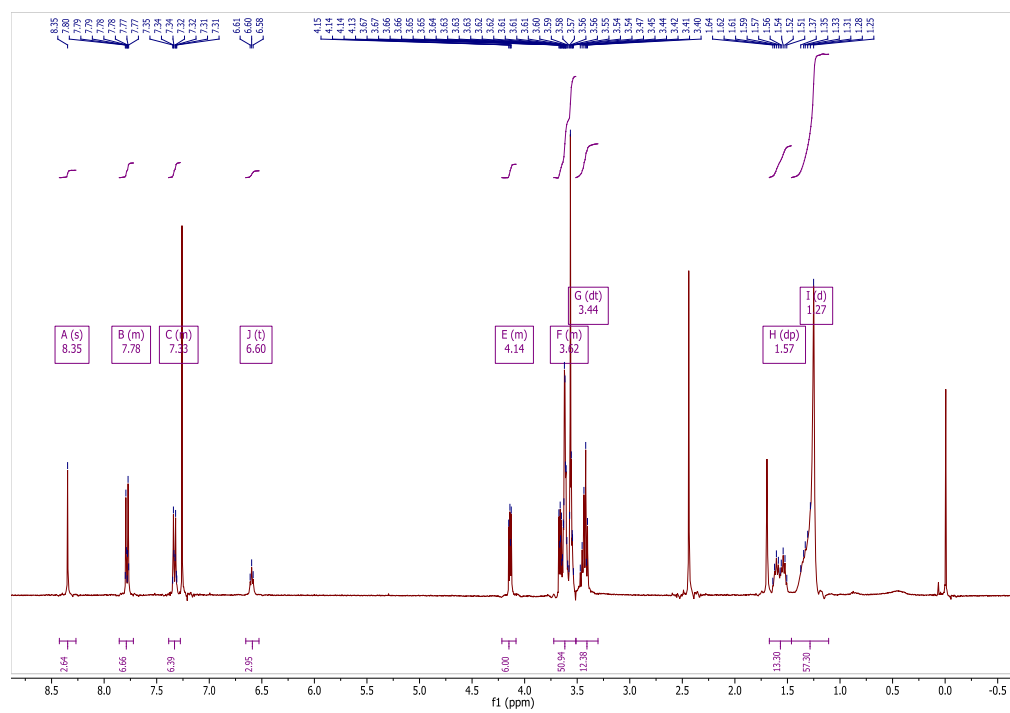

Supplementary Figure 1:  $^1\text{H}$  NMR of S1 in  $\text{CDCl}_3$

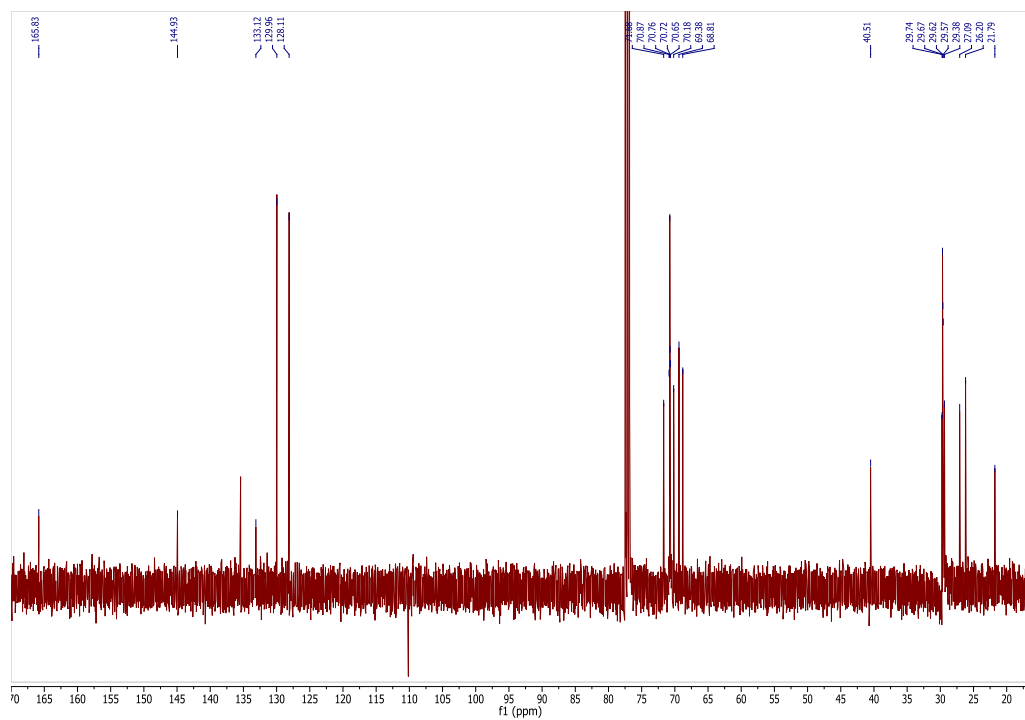

Supplementary Figure 2:  $^{13}\text{C}$  NMR of S1 in  $\text{CDCl}_3$

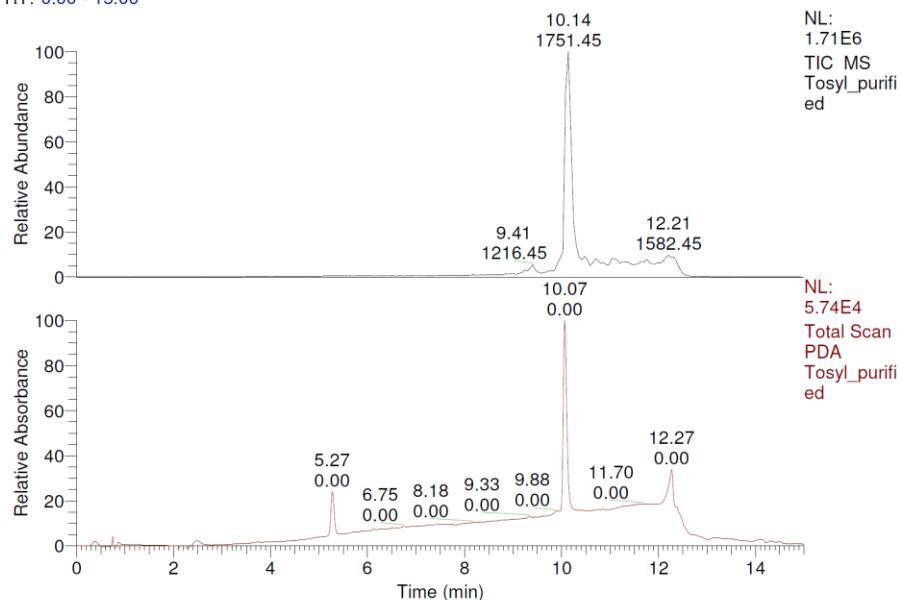

Tosyl\_purified #165-171 RT: 10.03-10.36 AV: 7 NL: 1.82E4  
T: ITMS + p ESI Full ms [1200.00-3700.00]

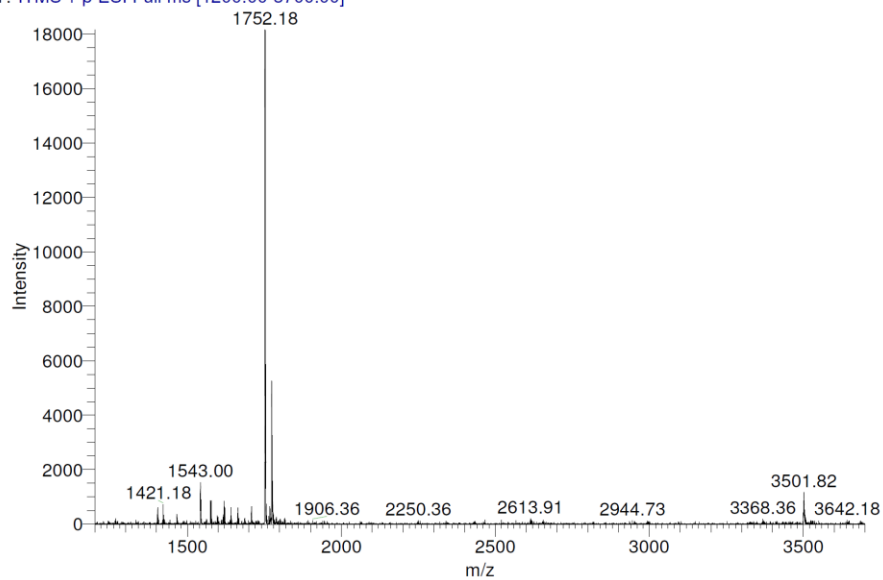

Supplementary Figure 3: LC/MS of S1

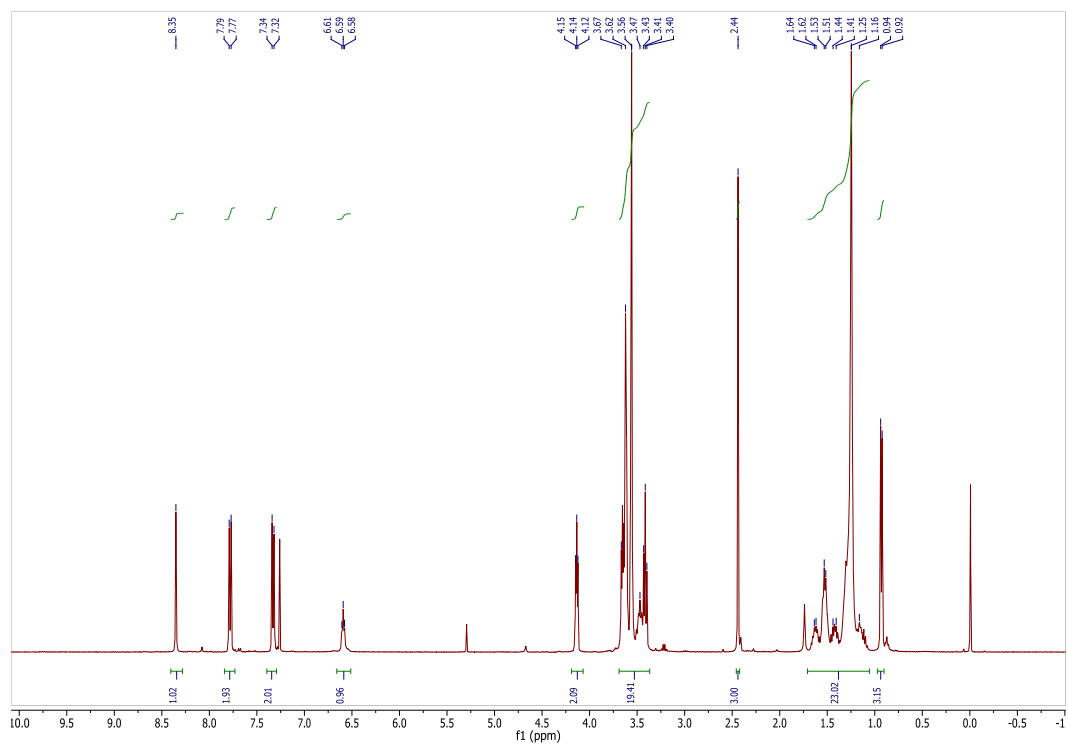

Supplementary Figure 4: <sup>1</sup>H NMR of S2 in CDCl<sub>3</sub>

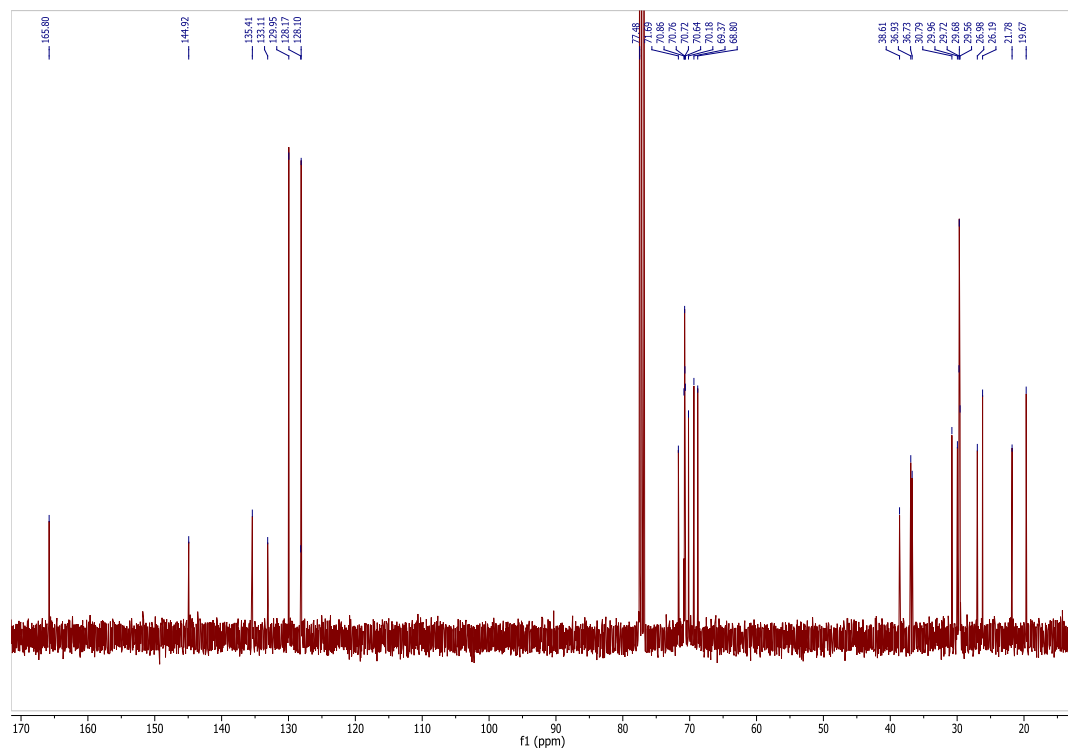

Supplementary Figure 5: <sup>13</sup>C NMR of S2 in CDCl<sub>3</sub>

RT: 0.00 - 15.00

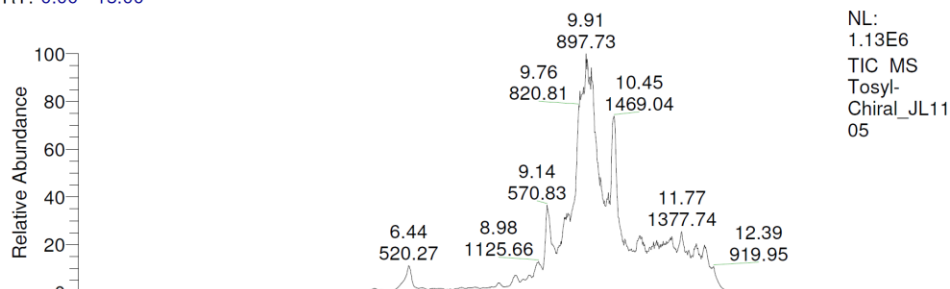

NL:  
1.13E6  
TIC MS  
Tosyl-  
Chiral\_JL11  
05

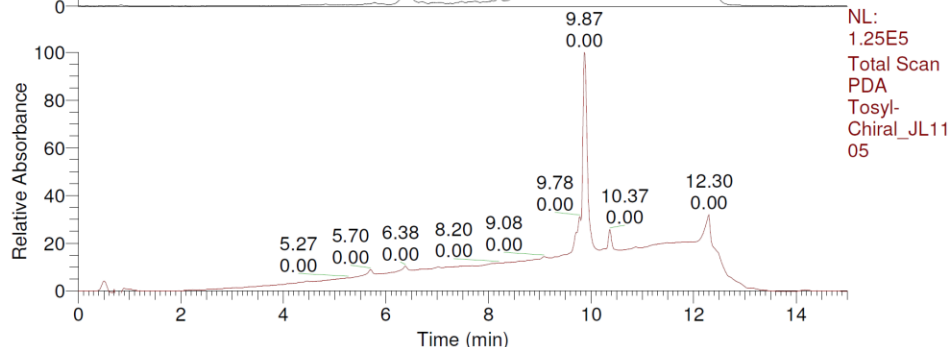

NL:  
1.25E5  
Total Scan  
PDA  
Tosyl-  
Chiral\_JL11  
05

Tosyl-Chiral\_JL1105 #544-609 RT: 9.58-10.31 AV: 66 NL: 7.59E4  
T: ITMS + c ESI Full ms [300.00-2000.00]

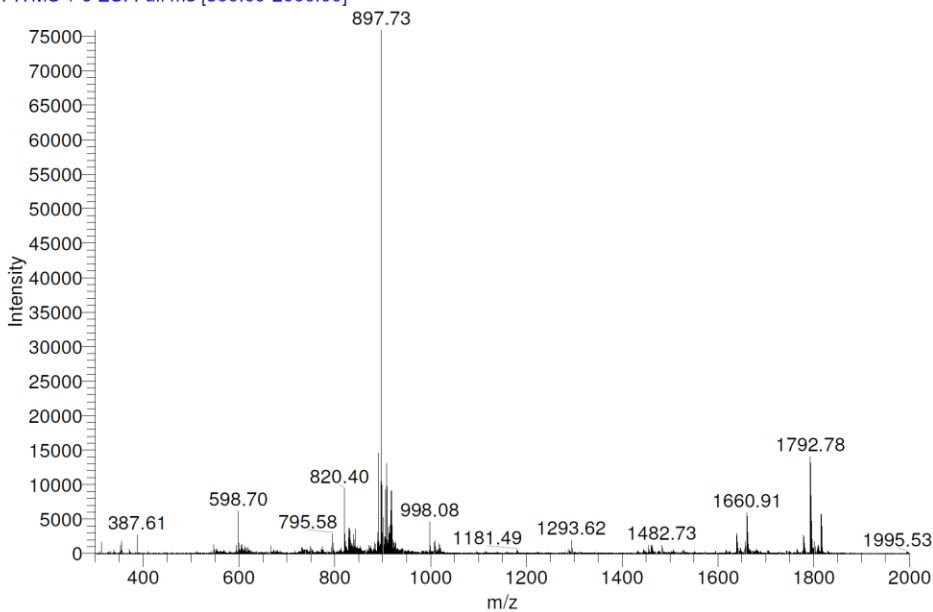

Supplementary Figure 6: LC/MS of S2

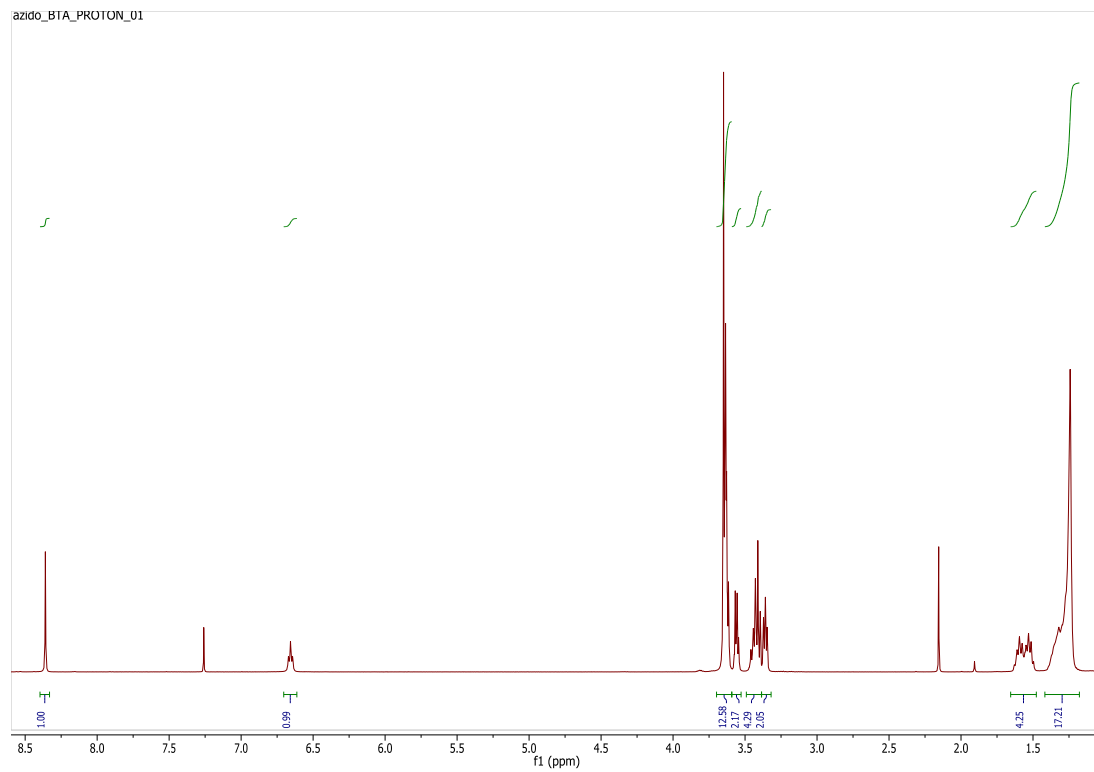

Supplementary Figure 7:  $^1\text{H}$  NMR of S3 in  $\text{CDCl}_3$

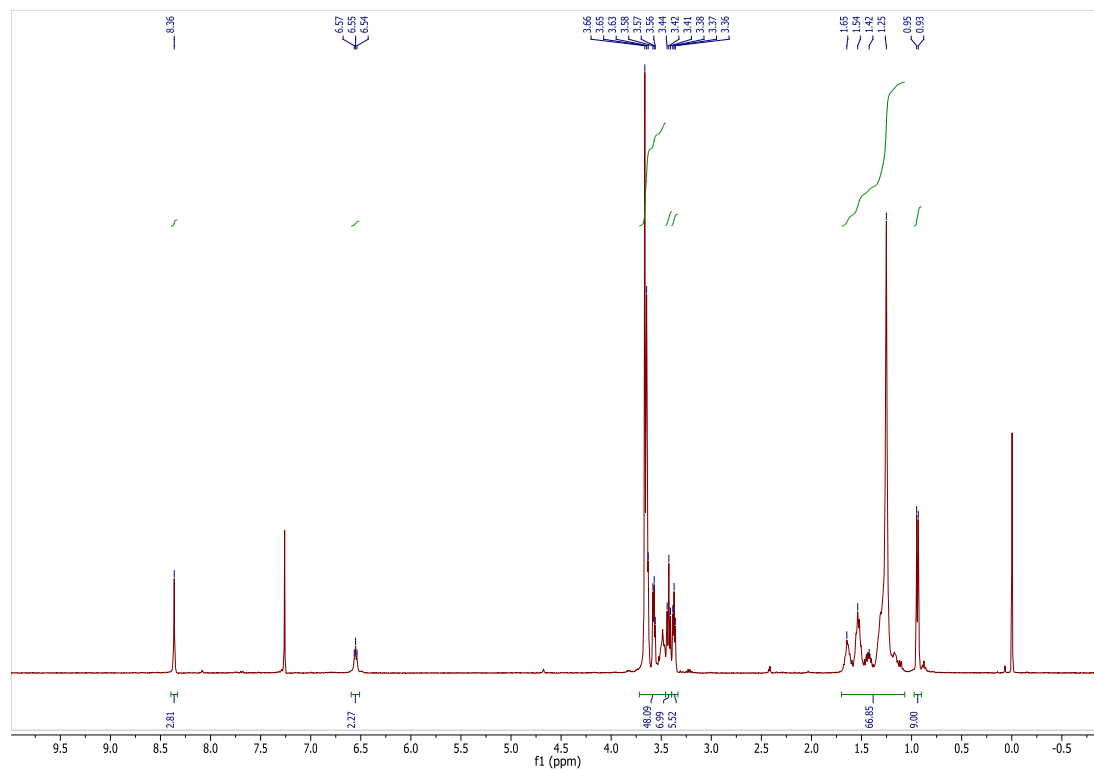

Supplementary Figure 8:  $^1\text{H}$  NMR of S4 in  $\text{CDCl}_3$

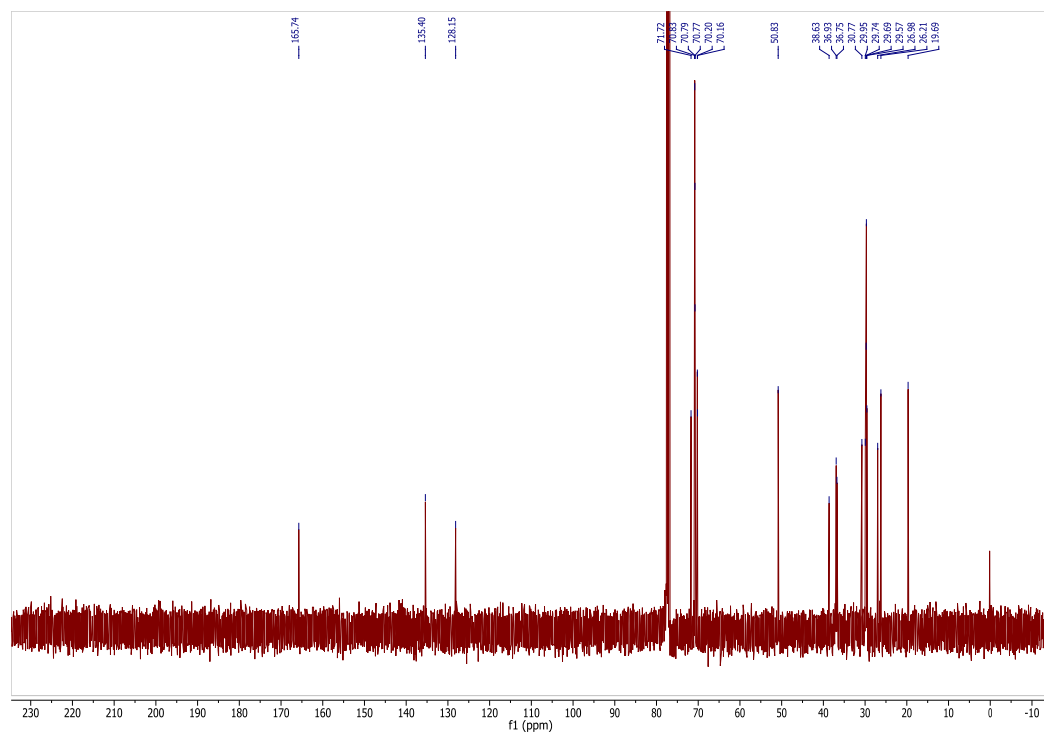

**Supplementary Figure 9: <sup>13</sup>C NMR of S4 in CDCl<sub>3</sub>**

RT: 0.00 - 15.00

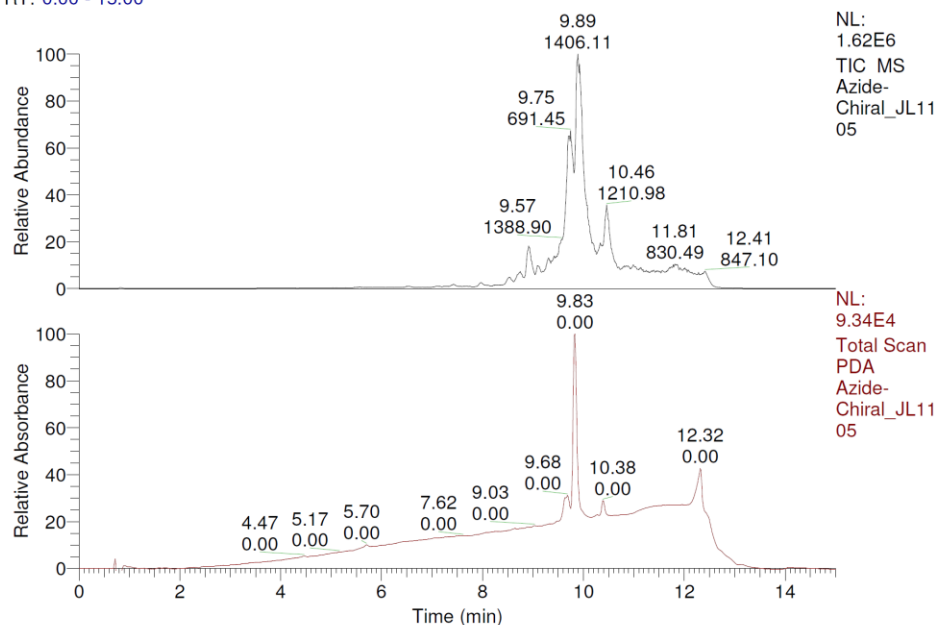

Azide-Chiral\_JL1105 #526-572 RT: 9.60-10.11 AV: 47 NL: 8.11E4  
T: ITMS + c ESI Full ms [300.00-2000.00]

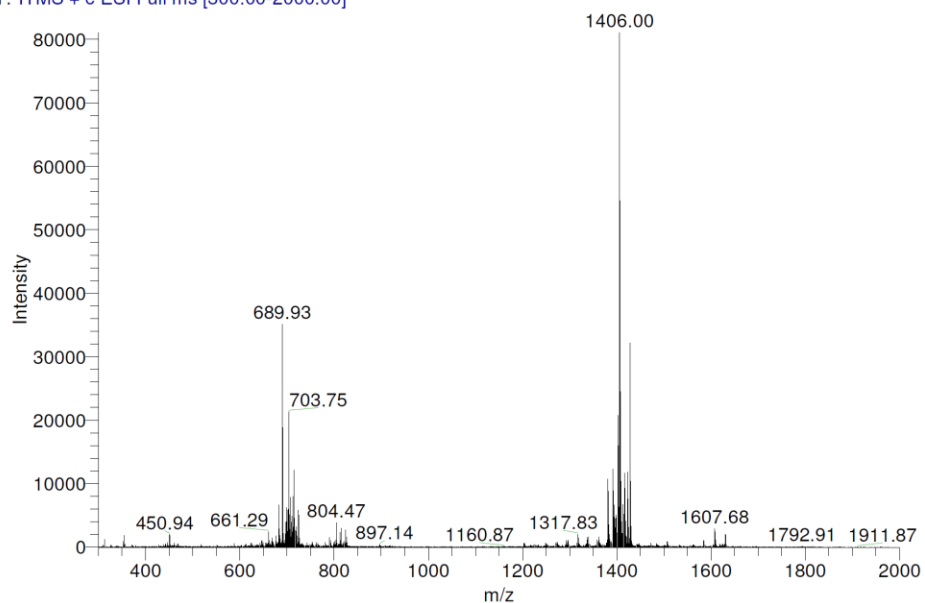

Supplementary Figure 10: LC/MS of S4

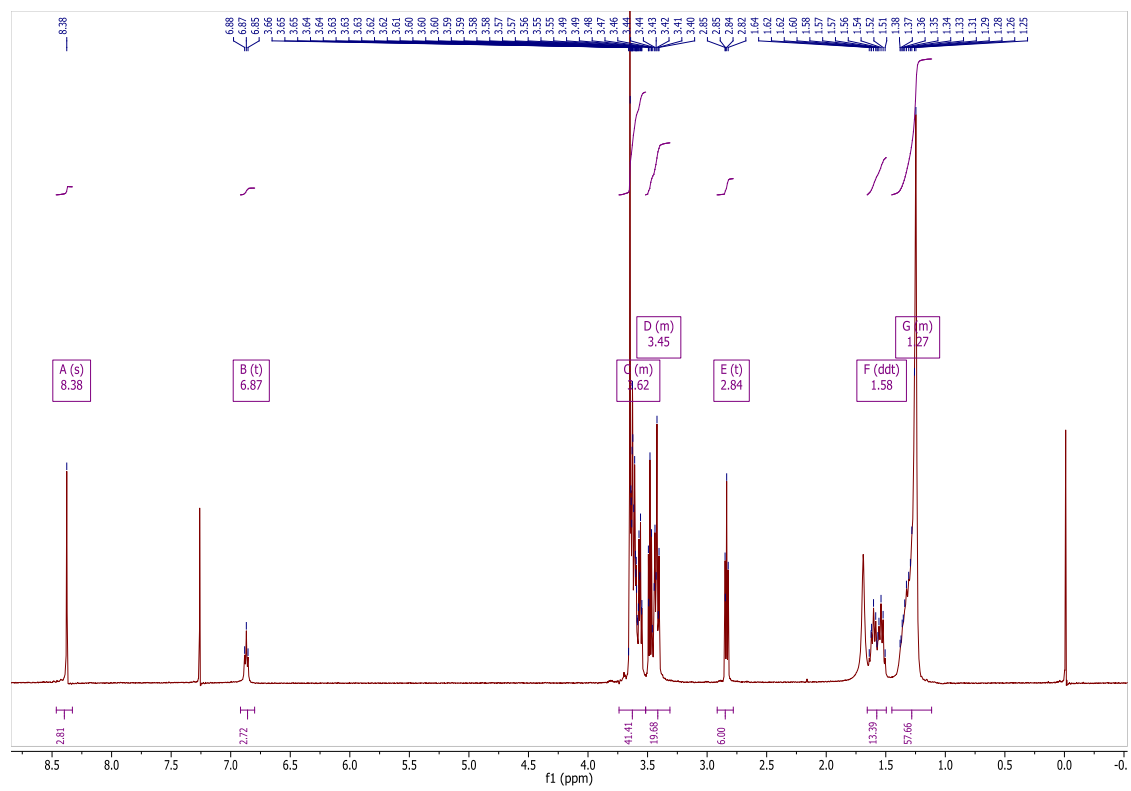

**Supplementary Figure 11:  $^1\text{H}$  NMR of S5 in  $\text{CDCl}_3$**



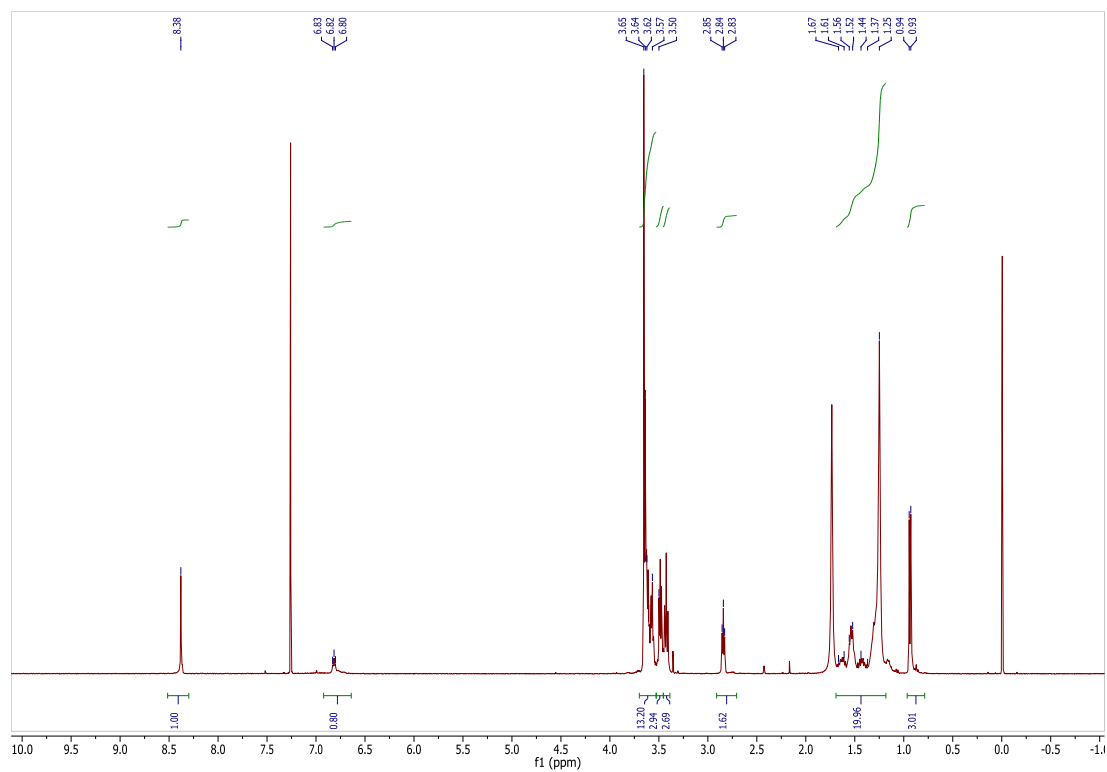

Supplementary Figure 12: <sup>1</sup>H NMR of S6 in CDCl<sub>3</sub>

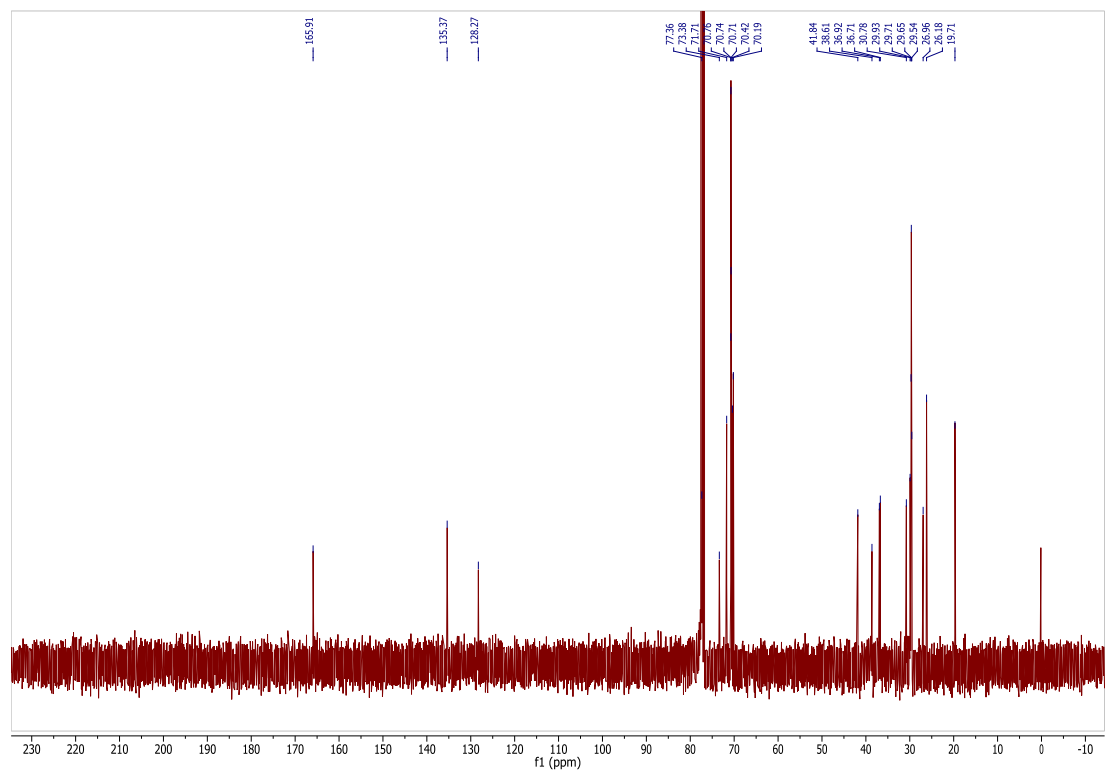

Supplementary Figure 13: <sup>13</sup>C NMR of S6 in CDCl<sub>3</sub>

Comment 1 CHCA/DCTB in THF calibration in D:\Data\Users 2013\Ralf\September\Matt\_B\September042013

Comment 2

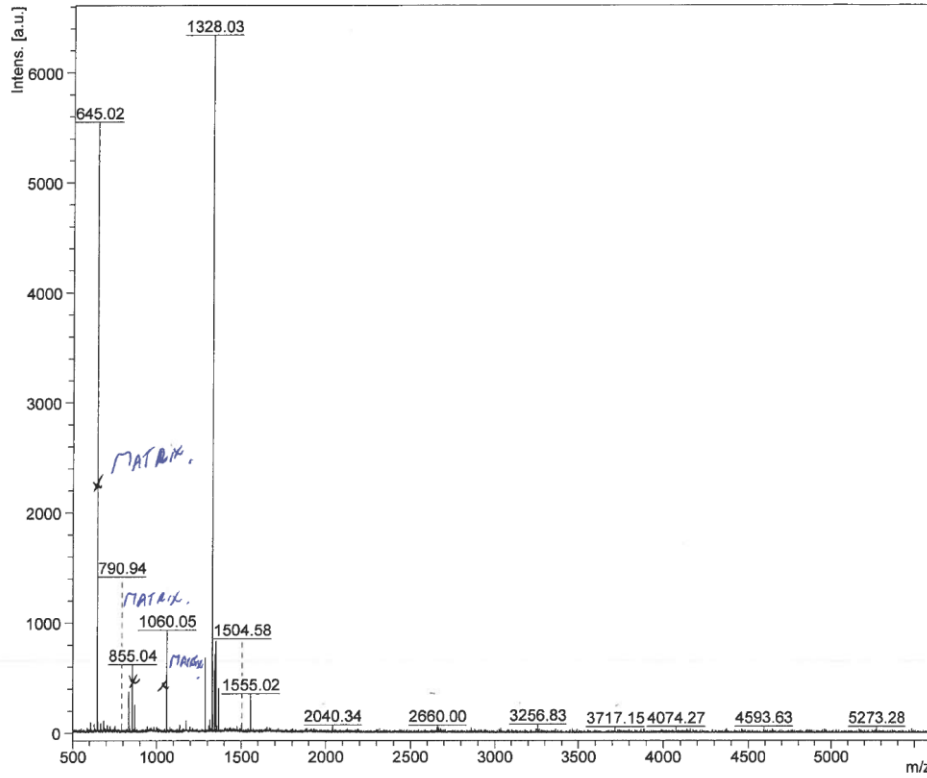

**Acquisition Parameter**

Date of acquisition 2013-09-04T15:05:19.729+01:00  
Acquisition method name D:\Methods\_old\flexControlMethods\RP\_700-3500\_Da.par  
Acquisition operation mode Reflector  
Voltage polarity POS  
Number of shots 500  
Name of spectrum used for calibration  
Calibration reference list used Cesium tri iodide positive mode

**Instrument Info**

User smo379  
Instrument ST-A2130  
Instrument type autoflex

**Supplementary Figure 14: MALDI of S6**

RT: 0.00 - 15.00

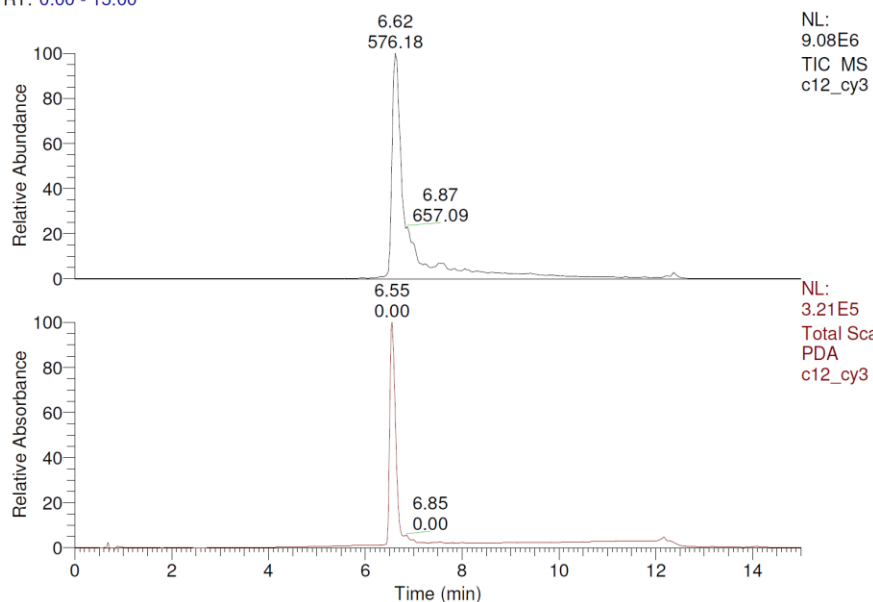

c12\_cy3 #154-167 RT: 6.47-6.94 AV: 14 NL: 4.95E5  
T: ITMS + p ESI Full ms [500.00-2000.00]

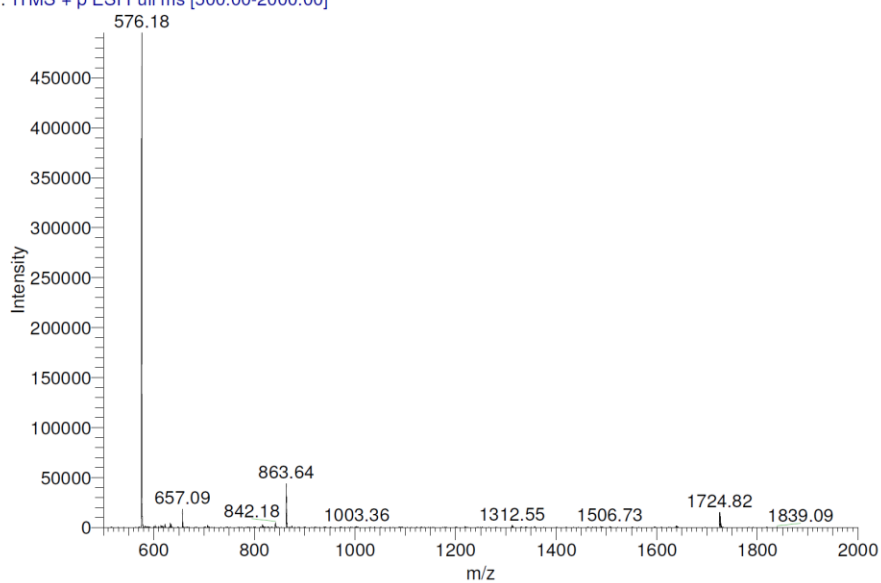

Supplementary Figure 15: LC/MS of 3a

RT: 0.00 - 15.00

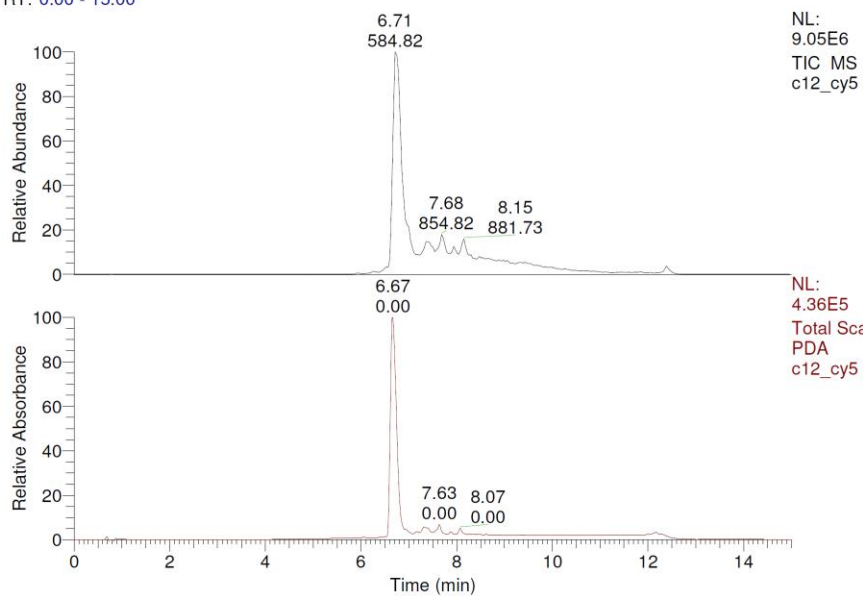

c12\_cy5 #157-170 RT: 6.57-7.04 AV: 14 NL: 5.05E5

T: ITMS + p ESI Full ms [500.00-2000.00]

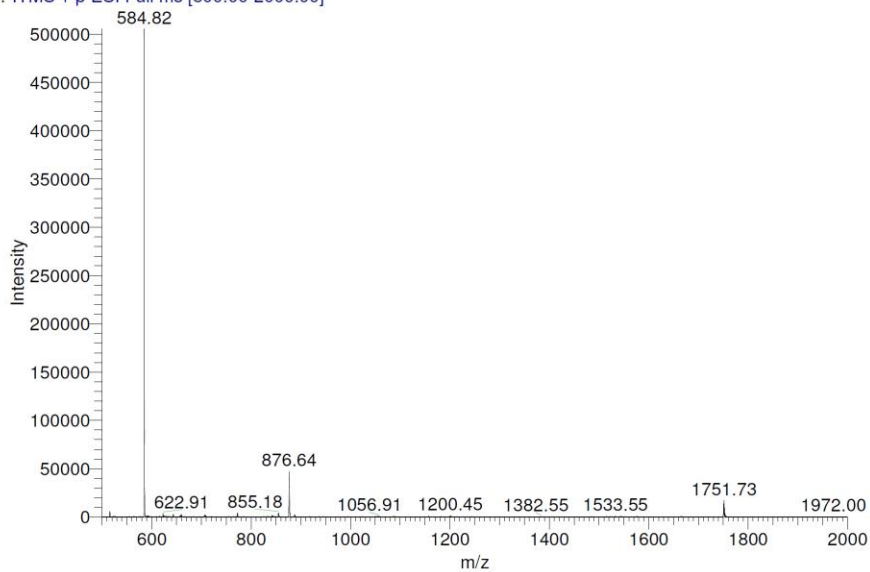

Supplementary Figure 16: LC/MS of 3b

RT: 0.00 - 15.00

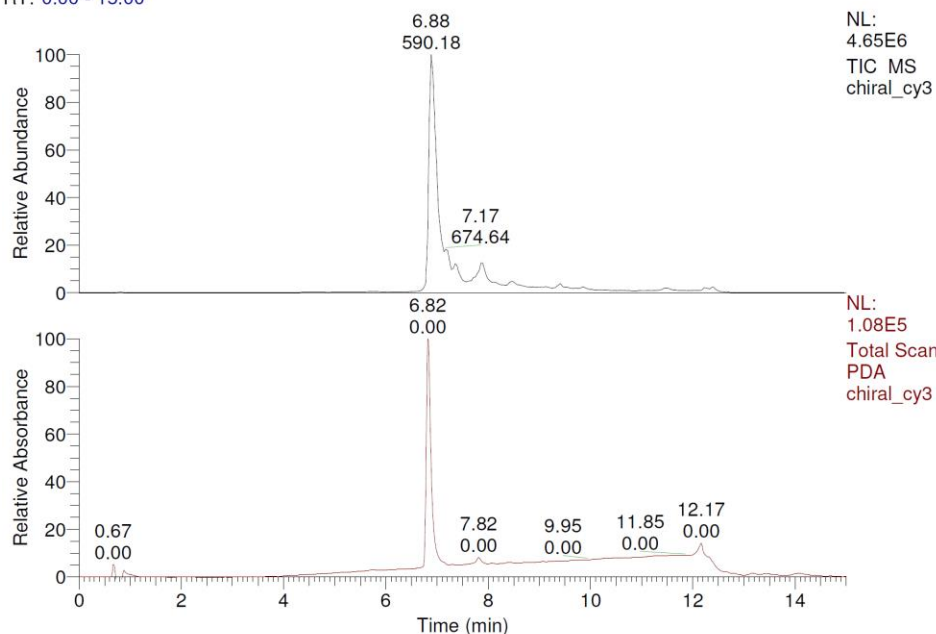

chiral\_cy3 #162-175 RT: 6.74-7.21 AV: 14 NL: 2.03E5  
T: ITMS + p ESI Full ms [500.00-2000.00]

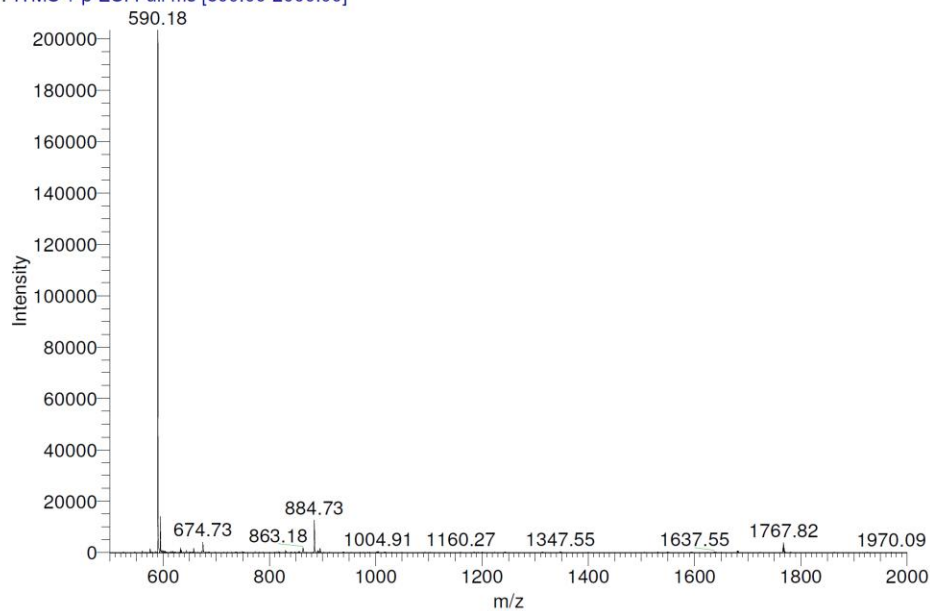

Supplementary Figure 17: LC/MS of 4a

RT: 0.00 - 15.00

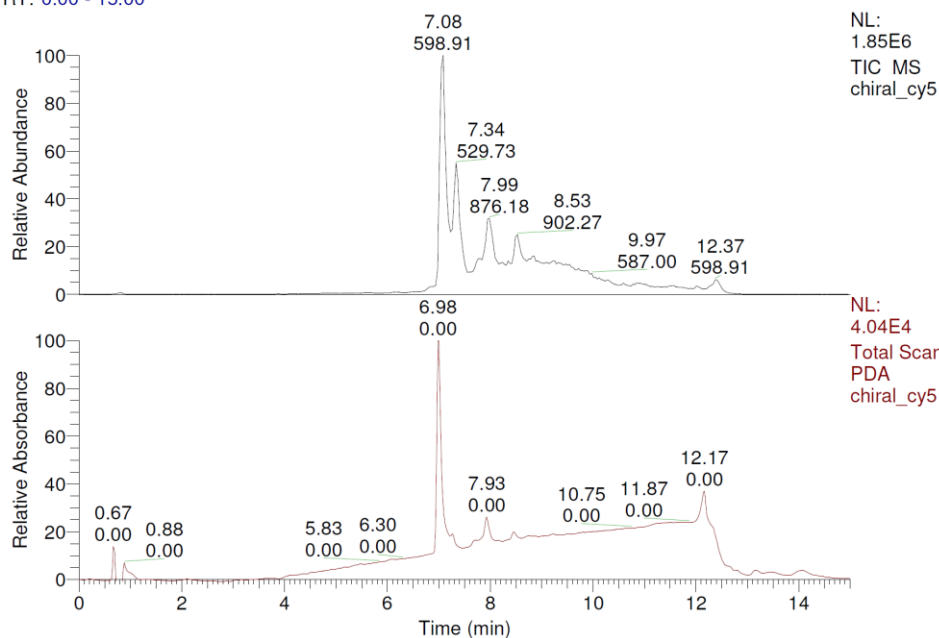

chiral\_cy5 #166-182 RT: 6.94-7.52 AV: 17 NL: 6.19E4  
T: ITMS + p ESI Full ms [500.00-2000.00]

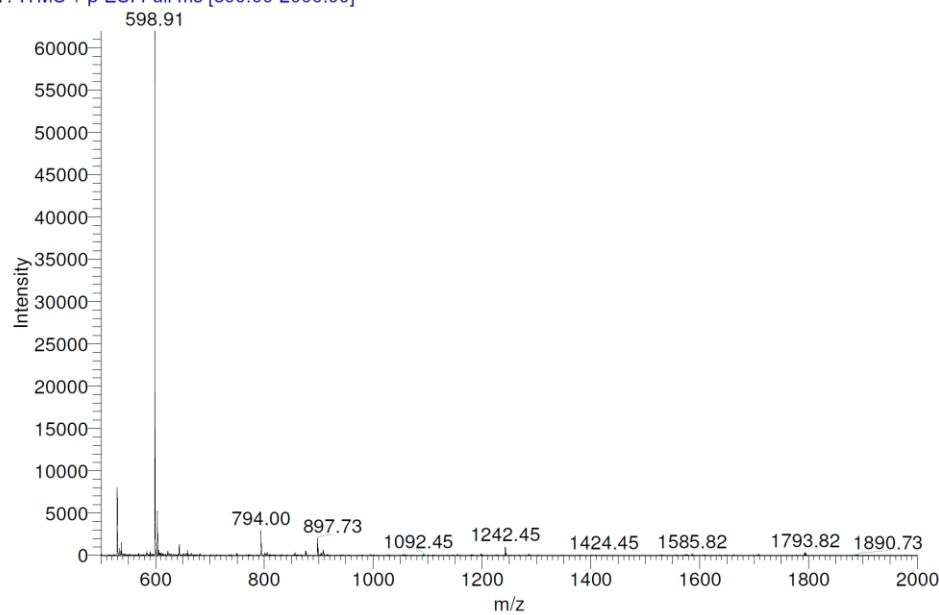

Supplementary Figure 18: LC/MS of 4b

## FRET Mixing studies

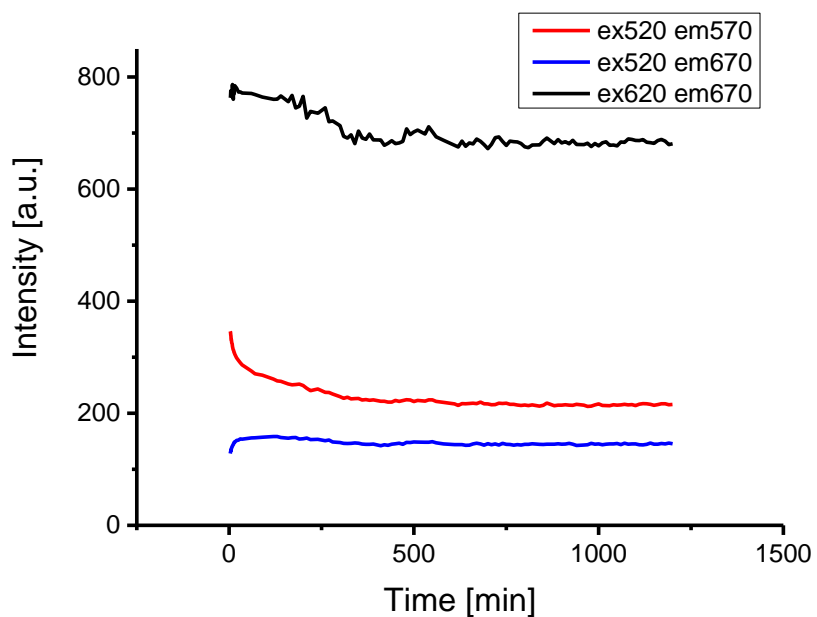

**Supplementary Figure 19: Representative raw data from FRET exchange experiment of achiral (1). Red curve is excitation at 520 nm and emission at 570 (Cy3 excitation and emission); blue curve is excitation at 520 nm and emission at 670 nm (Cy3 excitation and Cy5 emission); black curve is excitation at 620 nm and emission at 670 nm (Cy5 excitation and emission).**

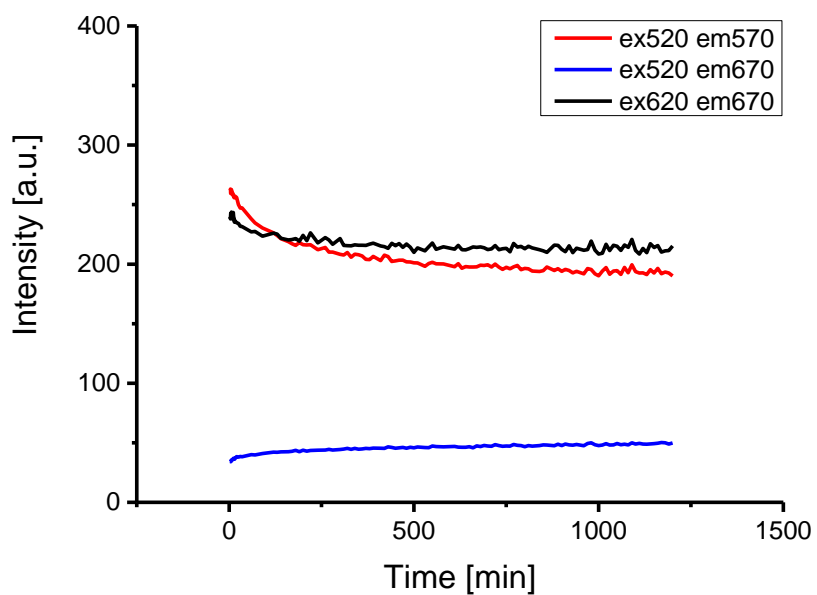

**Supplementary Figure 20: Representative raw data from FRET exchange experiment of chiral (2). Red curve is excitation at 520 nm and emission at 570 (Cy3 excitation and emission); blue curve is excitation at 520 nm and emission at 670 nm (Cy3 excitation and Cy5 emission); black curve is excitation at 620 nm and emission at 670 nm (Cy5 excitation and emission).**



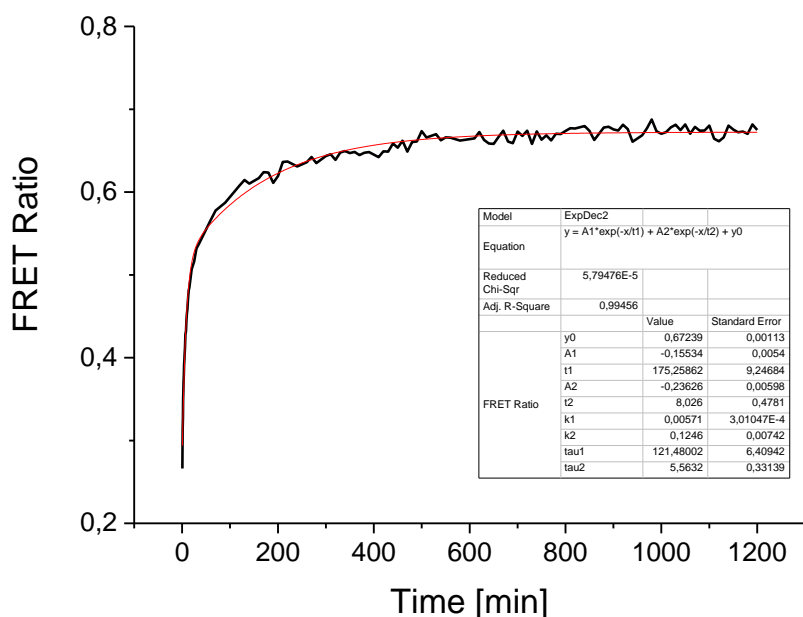

**Supplementary Figure 21: Curve fitting of FRET exchange for 1**

|                 |                                                        |                |            |
|-----------------|--------------------------------------------------------|----------------|------------|
| Model           | ExpDec2                                                |                |            |
| Equation        | $y = A1 \cdot \exp(-x/t1) + A2 \cdot \exp(-x/t2) + y0$ |                |            |
| Reduced Chi-Sqr | 5,79476E-5                                             |                |            |
| Adj. R-Square   | 0,99456                                                |                |            |
|                 | Value                                                  | Standard Error |            |
| FRET Ratio      | y0                                                     | 0,67239        | 0,00113    |
| FRET Ratio      | A1                                                     | -0,15534       | 0,0054     |
| FRET Ratio      | t1                                                     | 175,25862      | 9,24684    |
| FRET Ratio      | A2                                                     | -0,23626       | 0,00598    |
| FRET Ratio      | t2                                                     | 8,026          | 0,4781     |
| FRET Ratio      | k1                                                     | 0,00571        | 3,01047E-4 |
| FRET Ratio      | k2                                                     | 0,1246         | 0,00742    |
| FRET Ratio      | tau1                                                   | 121,48002      | 6,40942    |
| FRET Ratio      | tau2                                                   | 5,5632         | 0,33139    |

**Supplementary Table 1: Fitting parameters for exchange of 1**

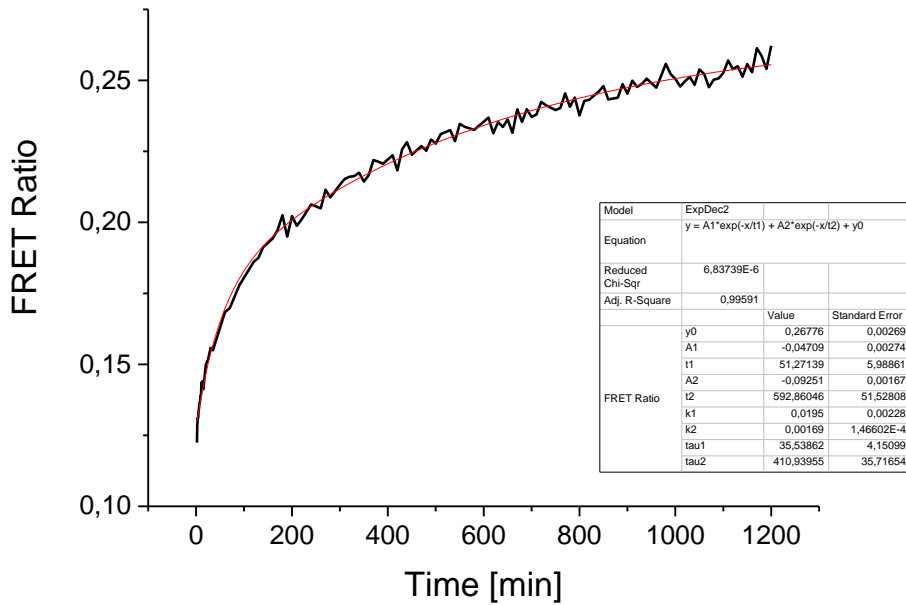

**Supplementary Figure 22: Curve fitting of FRET exchange for 2**

| Model           | ExpDec2                                                |           |                |
|-----------------|--------------------------------------------------------|-----------|----------------|
| Equation        | $y = A1 \cdot \exp(-x/t1) + A2 \cdot \exp(-x/t2) + y0$ |           |                |
| Reduced Chi-Sqr | 6,83739E-6                                             |           |                |
| Adj. R-Square   | 0,99591                                                |           |                |
|                 |                                                        | Value     | Standard Error |
| FRET Ratio      | y0                                                     | 0,26776   | 0,00269        |
| FRET Ratio      | A1                                                     | -0,04709  | 0,00274        |
| FRET Ratio      | t1                                                     | 51,27139  | 5,98861        |
| FRET Ratio      | A2                                                     | -0,09251  | 0,00167        |
| FRET Ratio      | t2                                                     | 592,86046 | 51,52808       |
| FRET Ratio      | k1                                                     | 0,0195    | 0,00228        |
| FRET Ratio      | k2                                                     | 0,00169   | 1,46602E-4     |
| FRET Ratio      | tau1                                                   | 35,53862  | 4,15099        |
| FRET Ratio      | tau2                                                   | 410,93955 | 35,71654       |

**Supplementary Table 2: Fitting parameters for curve of 2**

## Molecular Dynamics Simulations

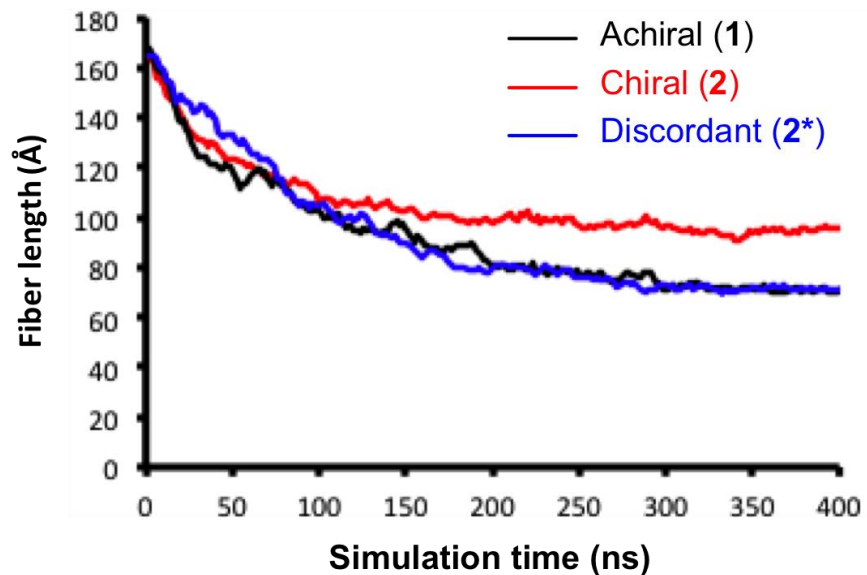

Supplementary Figure 23: Fiber length calculated from the MD simulations at variance of the simulation time

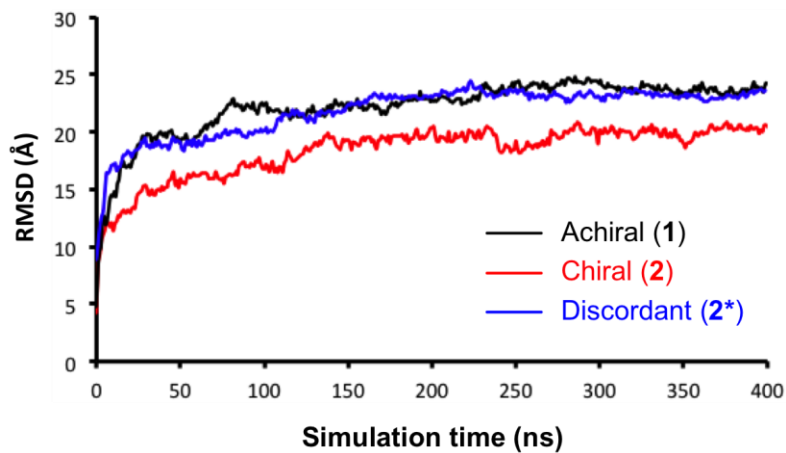

Supplementary Figure 24: RMSD data calculated from the MD simulations at variance of the simulation time

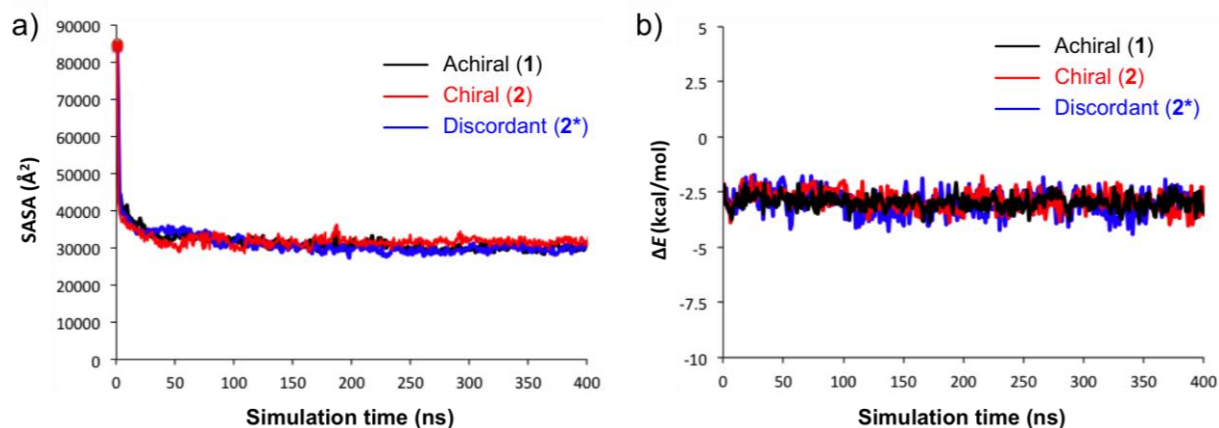

**Supplementary Figure 25: Other data assessing the systems equilibration. (a) The solvent accessible surface area (SASA) of the fibers calculated as a function of the simulation time. (b) The average per-BTA self-assembling energy ( $\Delta E$ ) for all systems calculated as a function of the simulation time.**

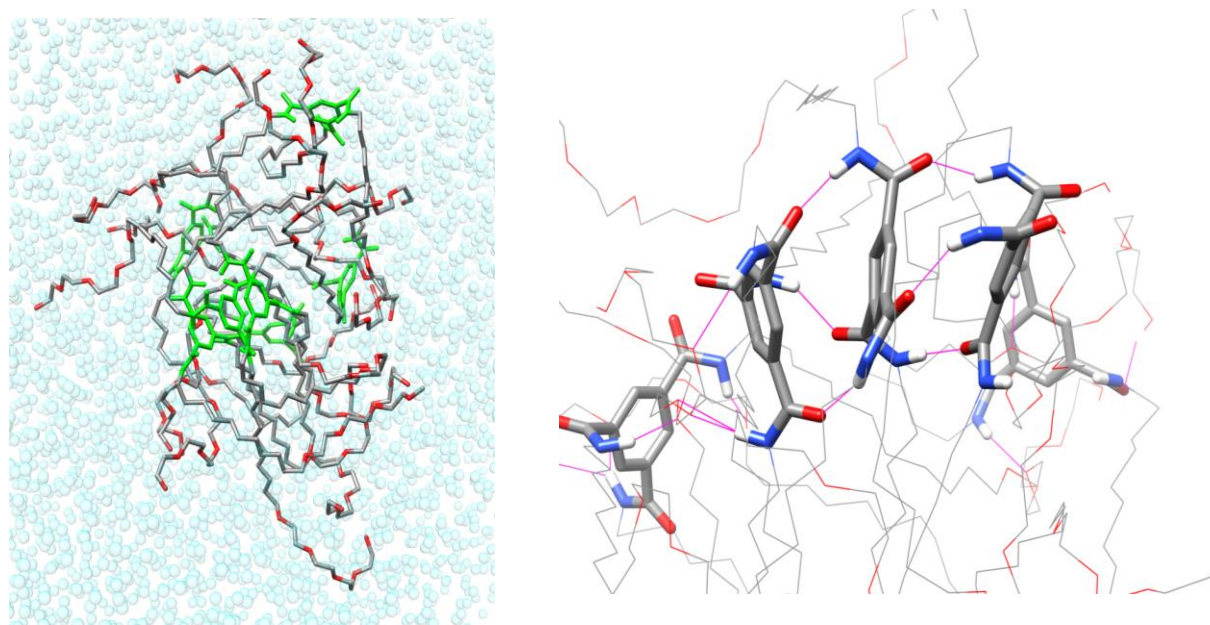

**Supplementary Figure 26: Final snapshot of the MD simulation of seven BTAs initially molecularly dissolved in water. During the MD simulation the BTAs aggregate in solution. After  $\approx 150$  ns, three BTAs (in stick) formed a stable, hydrogen bond stack that persisted for the last  $\approx 250$  ns of the simulation (see SI movie). Hydrogen bonds are colored in pink. Details of these simulations will be presented in a subsequent publication, but are shown here to support the robustness of the methods employed.**

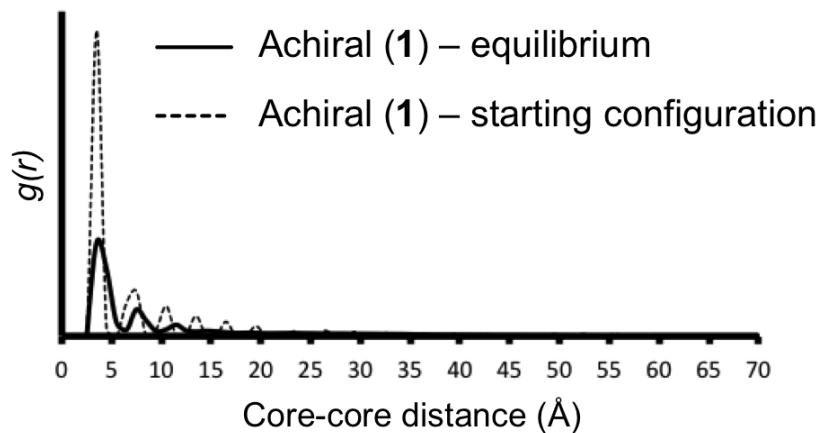

**Supplementary Figure 27: Radial distribution functions  $g(r)$  of the BTA cores (representative of the core-core stacking distances) obtained from the MD simulation of the achiral (1) fiber.**

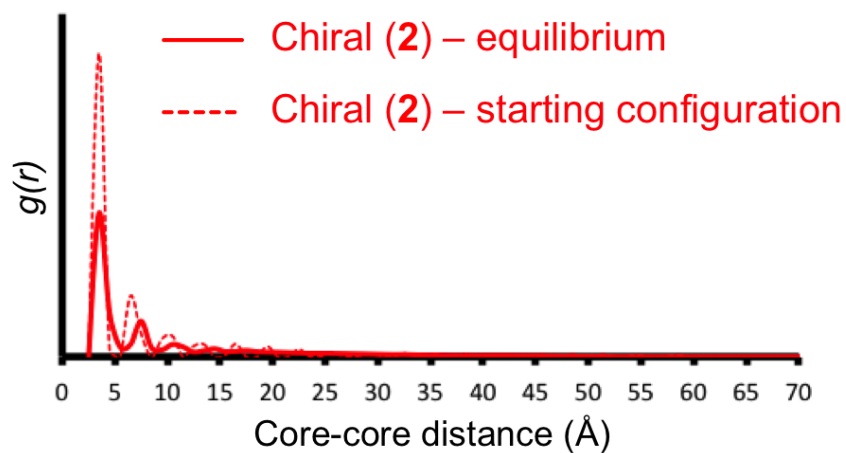

**Supplementary Figure 28: Radial distribution functions  $g(r)$  of the BTA cores (representative of the core-core stacking distances) obtained from the MD simulation of the achiral (2) fiber.**

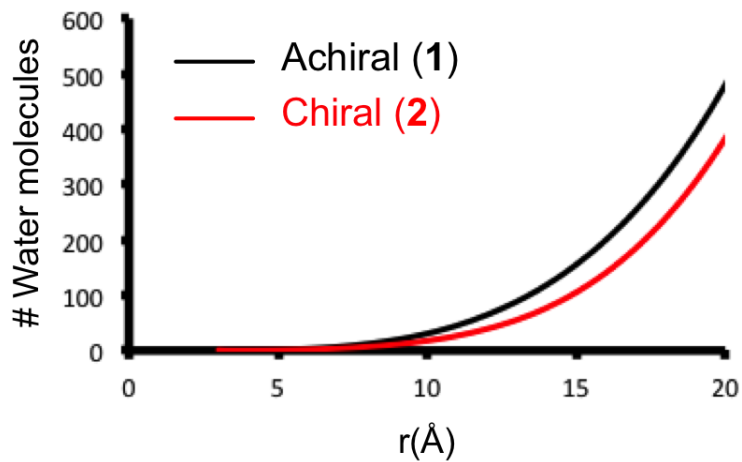

**Supplementary Figure 29: Number of water molecules at variance of the distance from center of fiber**

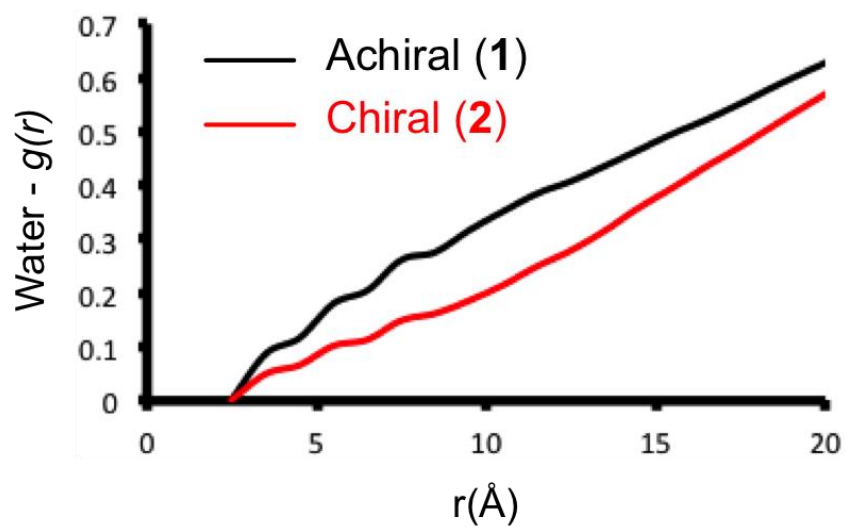

**Supplementary Figure 30: Radial distribution functions  $g(r)$  of water molecules at variance of the distance from center of fiber**

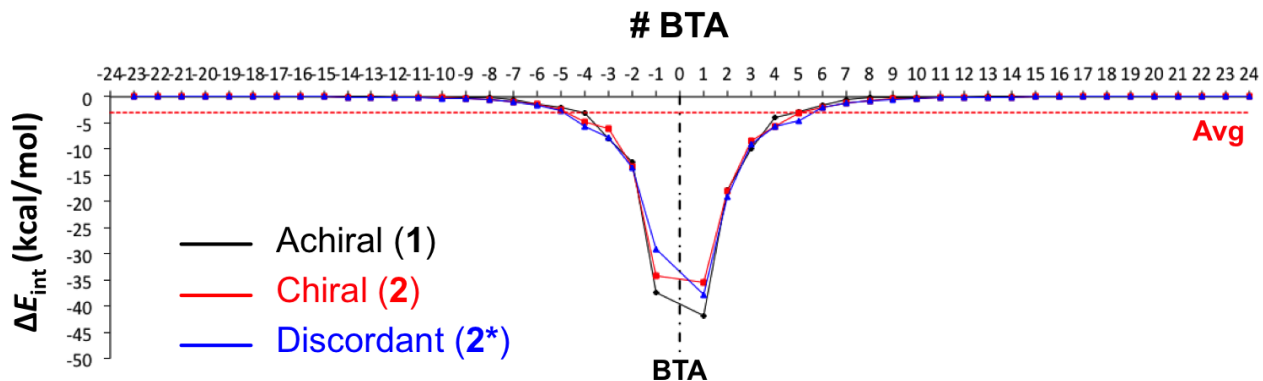

**Supplementary Figure 31: Distribution of the pairwise ( $\Delta E_{\text{int}}$ ) interaction energies of each BTA with the others in the fiber at variance of their position. Data are averaged over the equilibrated phase MD trajectories (the last 100 ns of the MD simulations). Data show that each BTA interacts strongly with the closest neighbor, and the BTA-BTA interaction rapidly decreases for increasing distance from the BTA (becoming negligible after the  $\approx 8^{\text{th}}$  neighbor). The average  $\Delta E_{\text{int}}$  ( $\approx -3.0$  kcal/mol for all cases) is represented as a dotted red line.**

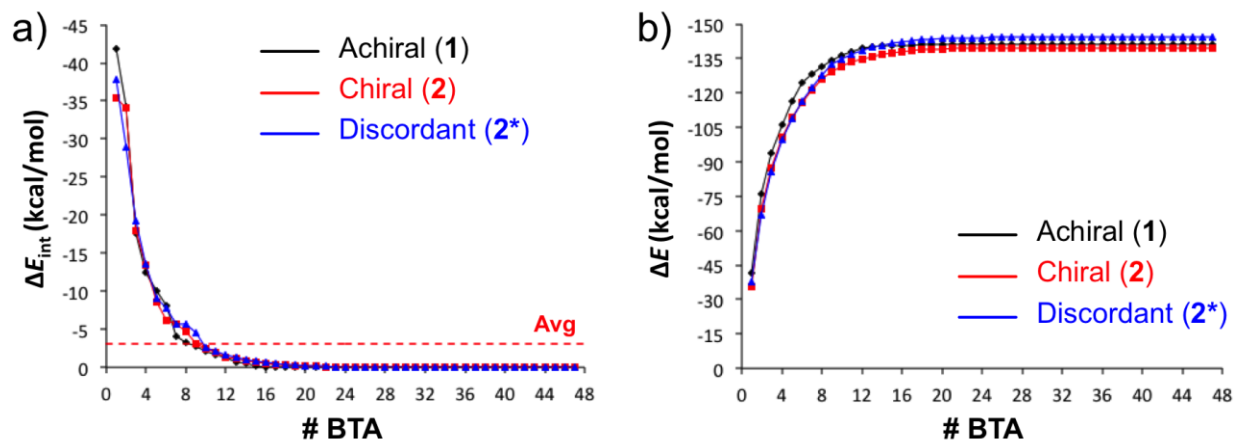

**Supplementary Figure 32: Distribution of the self-assembly energy for the BTAs along the fiber. (a) The pairwise  $\Delta E_{\text{int}}$  data (same as reported in Figure S24) at variance of the BTA neighbor number. (b) Cumulative  $\Delta E$  self-assembly energy ( $\Delta E$ ) data calculated accounting for an increasing number of neighbor BTAs in the fiber at increasing distance from the BTAs. The  $\Delta E$  data saturates after  $\approx 16$ -20 neighbor BTAs ( $\approx 8$ -10 per-side), demonstrating that our model containing 48 BTA, where each BTA has 23.5 neighbors, is, from the interaction energies point of view, representative of the fibers bulk. The maximum plateau value of the  $\Delta E$  divided for the total number of BTA neighbors gives the average per-BTA  $\Delta E$  values ( $\approx 3.0$  kcal/mol – red dotted line in panel (a)) reported in Figure 4 and Figure 5 in the main paper.**

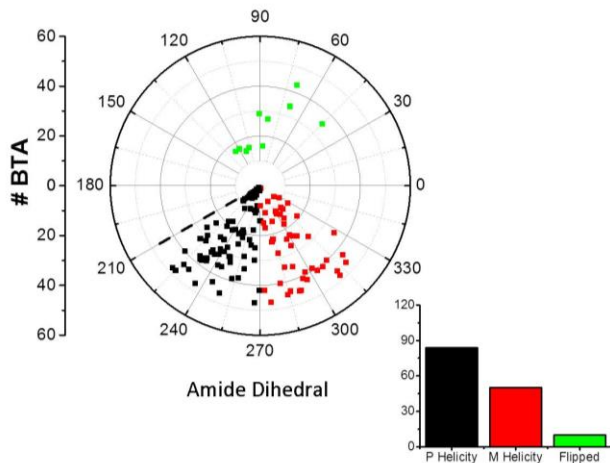

**Supplementary Figure 33: Radial distribution of amide dihedrals calculated from the last 100ns of MD simulation for the discordant (2\*) fiber. Note that this fiber does retain some of its initial *P*-helicity.**

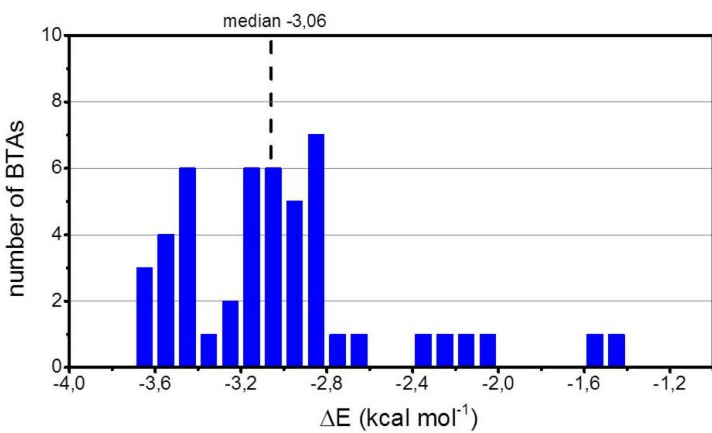

**Supplementary Figure 34: Histogram of individual self-assembly energies ( $\Delta E$ ) for BTAs within the discordant (2\*) fiber.**



## Infrared Spectroscopy

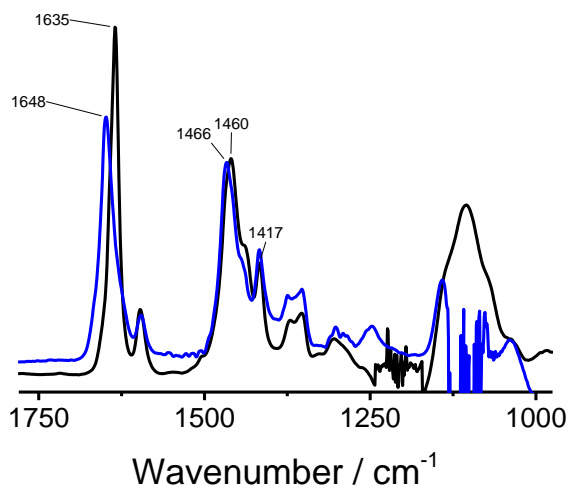

**Supplementary Figure 35: IR spectrum of a solution of 1 (c = 50 mg/ml) at room temperature in D<sub>2</sub>O (black) displaying a carbonyl stretch vibration indicative for stacked hydrogen bonding and MeOD (blue) displaying a carbonyl stretch vibration associated with molecular dissolution (measured using a CaF<sub>2</sub> cell with pathlength 0.05 mm).**

## Supplementary Methods

### Detailed synthetic procedures

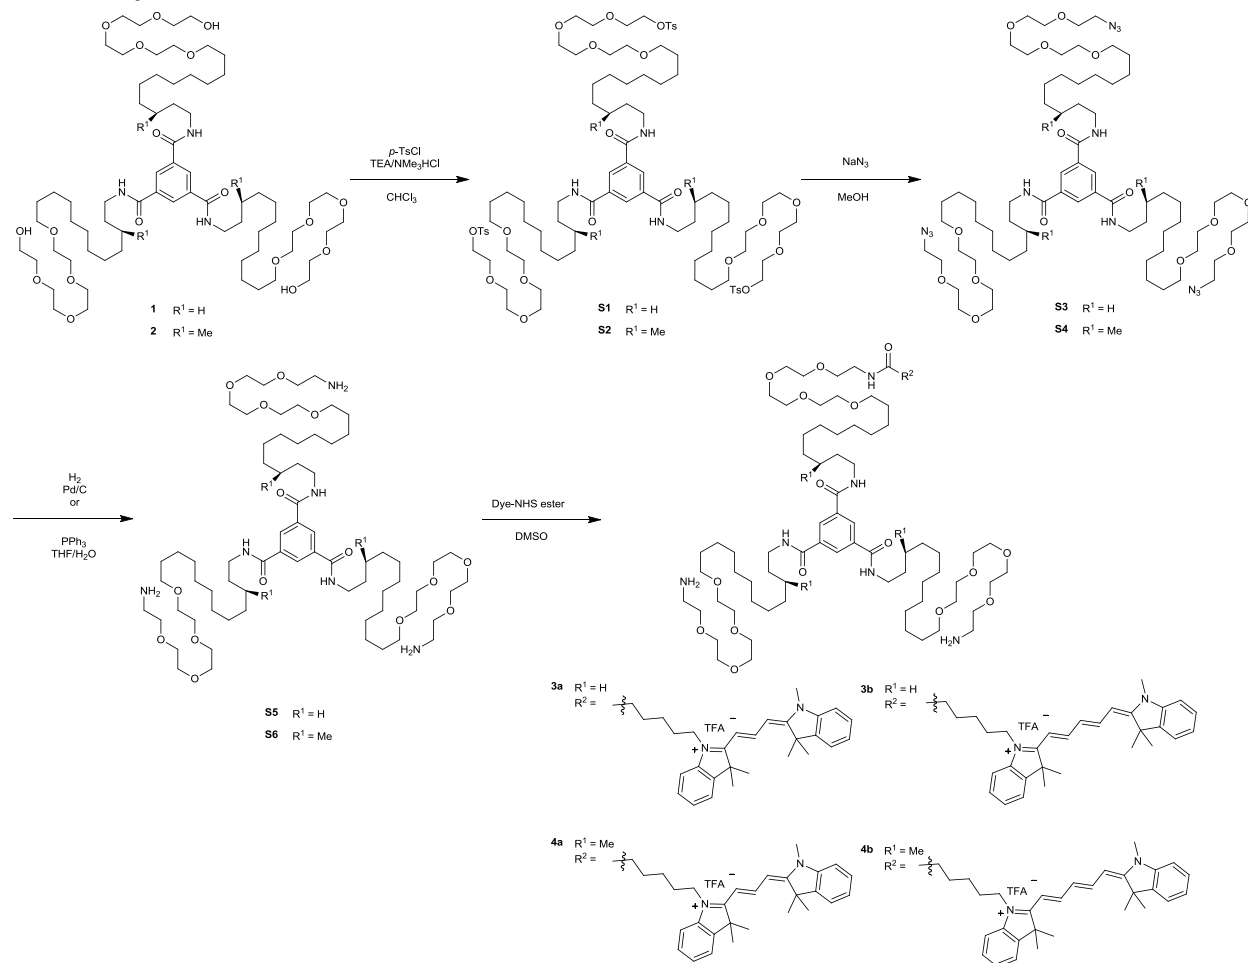

**1,1',1''-(benzene-1,3,5-triyl)tris(1-oxo-15,18,21,24-tetraoxa-2-azahexacosane-26,1-diyl) tris(4-methylbenzenesulfonate) (S1).** A 5 mL round-bottomed flask was charged with BTA **1**<sup>1</sup> (25 mg, 19.4 μmol), *para*-toluenesulfonic acid chloride (22 mg, 0.12 mmol), and trimethylamine hydrochloride (3 mg, 0.03 mmol) in CHCl<sub>3</sub> (Volume: 2 ml) to give a colorless solution. Then, 3 drops of TEA were added to the reaction mixture and the reaction was allowed to run over 24 hours. The reaction mixture was purified *via* column chromatography to yield the tri-tosylated BTA **S1** as a colorless oil (30 mg, 16.9 μmol, 87% yield). TLC (CHCl<sub>3</sub>:MeOH, 96:4 v/v): R<sub>f</sub> ≈ 0.35; <sup>1</sup>H NMR (400 MHz, CDCl<sub>3</sub>): δ 8.35 (s, 3H), 7.78 (d, *J* = 8.0 Hz, 6H), 7.33 (d, *J* = 8.0 Hz, 6H), 6.60 (t, *J* = 5.6 Hz, 3H), 4.14 (t, *J* = 4.9 Hz, 6H), 3.70–3.35 (m, 54H), 2.44 (s, 9H), 1.70–1.05 (m, 57H); <sup>13</sup>C NMR (100 MHz, CDCl<sub>3</sub>) δ 165.8, 144.9, 135.4, 133.1, 130.0, 128.2, 128.1, 71.7, 70.9, 70.8, 70.7, 70.6, 70.2, 69.4, 68.8, 40.5, 29.7, 29.7, 29.6, 29.6, 29.6, 29.4, 27.1, 26.2, 21.8; MS (ESI, m/z): [M+H]<sup>+</sup> calcd. for C<sub>90</sub>H<sub>148</sub>N<sub>3</sub>O<sub>24</sub>S<sub>3</sub> 1751.96; found, 1752.18.

**(5S,5'S,5''S)-1,1',1''-(benzene-1,3,5-triyl)tris(5-methyl-1-oxo-15,18,21,24-tetraoxa-2-azahexacosane-26,1-diyl) tris(4-methylbenzenesulfonate) (S2).** A 5 mL round-bottomed flask was charged with chiral

BTA **2**<sup>1</sup> (14 mg, 10.5  $\mu$ mol), *para*-toluenesulfonic acid chloride (30 mg, 0.16 mmol), and trimethylamine hydrochloride (3 mg, 0.03 mmol) in CHCl<sub>3</sub> (Volume: 2 ml) to give a colorless solution. Then, 3 drops of TEA were added to the reaction mixture and the reaction was allowed to run over 48 hours; at 24 hours another equivalent of trimethylamine hydrochloride (3 mg, 0.03 mmol) was added to the reaction. The reaction mixture was purified *via* column chromatography to yield the tri-tosylated BTA **S2** as a colorless oil (12 mg, 6.7  $\mu$ mol, 64% yield). TLC (CHCl<sub>3</sub>:MeOH, 96:4 v/v): R<sub>f</sub>  $\approx$  0.35; <sup>1</sup>H NMR (400 MHz, CDCl<sub>3</sub>)  $\delta$  8.35 (s, 3H), 7.78 (d, *J* = 8.0 Hz, 6H), 7.33 (d, *J* = 8.0 Hz, 6H), 6.59 (t, *J* = 5.6 Hz, 3H), 4.13 (t, *J* = 4.9 Hz, 6H), 3.70–3.35 (m, 54H), 2.44 (s, 9H), 1.70–1.05 (m, 57H), 0.93 (d, *J* = 6.4 Hz, 9H); <sup>13</sup>C NMR (100 MHz, CDCl<sub>3</sub>)  $\delta$  165.8, 144.9, 135.4, 133.1, 130.0, 128.2, 128.1, 71.7, 70.9, 70.8, 70.7, 70.6, 70.2, 69.4, 68.8, 38.6, 36.9, 36.7, 30.8, 30.0, 29.7, 29.7, 29.6, 27.0, 26.2, 21.8, 19.7; MS (ESI, m/z): [M+H]<sup>+</sup> calcd. for C<sub>93</sub>H<sub>154</sub>N<sub>3</sub>O<sub>24</sub>S<sub>3</sub>, 1793.01; found, 1792.78.

**N<sup>1</sup>,N<sup>3</sup>,N<sup>5</sup>-tris(1-azido-3,6,9,12-tetraoxatetracosan-24-yl)benzene-1,3,5-tricarboxamide (S3)**. In a 5 mL sealed vial tri-tosylated BTA **S1** (20 mg, 11.1  $\mu$ mol) and sodium azide (30 mg, 0.616 mmol) were suspended in methanol (1.5 ml) to give a colorless suspension. The suspension was then heated to 60°C over 16 hours, monitoring reaction conversion *via* TLC. Upon completion, MeOH was removed, the residue suspended in CHCl<sub>3</sub> and then purified *via* column chromatography yielding the tri-azide BTA **S3** as a colorless oil (15.6 mg, 11.1  $\mu$ mol, quant.). Characterization matches literature.<sup>2</sup> TLC (CHCl<sub>3</sub>:MeOH, 94:6 v/v): R<sub>f</sub>  $\approx$  0.3; <sup>1</sup>H NMR (400 MHz, CDCl<sub>3</sub>)  $\delta$  8.36 (s, 3H), 6.65 (t, *J* = 5.5 Hz, 3H), 3.70–3.45 (m, 48H), 3.45–3.30 (m, 12H), 1.70–1.15 (m, 57H).

**N<sup>1</sup>,N<sup>3</sup>,N<sup>5</sup>-tris((S)-1-azido-22-methyl-3,6,9,12-tetraoxatetracosan-24-yl)benzene-1,3,5-tricarboxamide (S4)**. In a 5 mL sealed vial tri-tosylated BTA **S2** (11 mg, 6.1  $\mu$ mol) and sodium azide (20 mg, 0.308 mmol) were suspended in methanol (1 ml) to give a colorless suspension. The suspension was then heated to 60°C over 48 hours, monitoring reaction conversion *via* TLC. Upon completion, MeOH was removed, the residue suspended in CHCl<sub>3</sub> and then purified *via* column chromatography yielding the tri-azide BTA **S4** as a colorless oil (8.5 mg, 6.1  $\mu$ mol, quant.). TLC (CHCl<sub>3</sub>:MeOH, 94:6 v/v): R<sub>f</sub>  $\approx$  0.3; <sup>1</sup>H NMR (400 MHz, CDCl<sub>3</sub>)  $\delta$  8.26 (s, 3H), 6.55 (t, *J* = 5.5 Hz, 3H), 3.70–3.45 (m, 48H), 3.42 (t, *J* = 6.8 Hz, 6H), 3.37 (t, *J* = 5.1 Hz, 6H), 1.70–1.05 (m, 57H), 0.94 (d, *J* = 6.4 Hz, 9H); <sup>13</sup>C NMR (100 MHz, CDCl<sub>3</sub>)  $\delta$  165.7, 135.4, 128.2, 71.7, 70.8, 70.8, 70.8, 70.2, 70.2, 50.8, 38.6, 36.9, 36.8, 30.8, 30.0, 29.7, 29.7, 29.6, 27.0, 26.2, 19.7; MS (ESI, m/z) [M+H]<sup>+</sup> calcd. for C<sub>72</sub>H<sub>134</sub>N<sub>12</sub>O<sub>15</sub>, 1406.00; found, 1406.00.

**N<sup>1</sup>,N<sup>3</sup>,N<sup>5</sup>-tris(1-amino-3,6,9,12-tetraoxatetracosan-24-yl)benzene-1,3,5-tricarboxamide (S5)**. In a 5 mL round-bottomed flask tri-azide BTA **S3** (15 mg, 11  $\mu$ mol) and triphenyl phosphine (5 mg, 19  $\mu$ mol) were dissolved in 2 mL of THF. After stirring at room temperature overnight, 500  $\mu$ L of H<sub>2</sub>O was added and the reaction was allowed to stir at room temperature over a second night. The reaction could be monitored by TLC (5% MeOH/CHCl<sub>3</sub>). After completion of hydrolysis, the reaction mixture was loaded directly on a silica column. Triphenylphosphine and its oxide could be removed by eluting with 5% MeOH/CHCl<sub>3</sub>, while the product only moved upon addition of *i*-PrNH<sub>2</sub> (1%), yielding **S5** as a colorless solid (12 mg, 9  $\mu$ mol, 81%). Characterization matches literature.<sup>2</sup> ***It is worth noting that this is the preferred method of reduction, as it prevents unwanted side products and is much cleaner.*** TLC

(CHCl<sub>3</sub>:MeOH:*i*-PrNH<sub>2</sub>, 90:8:2 v/v): R<sub>f</sub> ≈ 0.3; <sup>1</sup>H NMR (400 MHz, CDCl<sub>3</sub>) δ 8.38 (s, 3H), 6.87 (t, *J* = 5.7 Hz, 3H), 3.70–3.45 (m, 48H), 3.50–3.35 (m, 18H), 1.58 (m, 12H), 1.40–1.20 (m, 57H).

***N*<sup>1</sup>,*N*<sup>3</sup>,*N*<sup>5</sup>-tris((*S*)-1-amino-22-methyl-3,6,9,12-tetraoxatetracosan-24-yl)benzene-1,3,5-tricarboxamide (S6).** In a 5 mL round-bottomed flask tri-azide BTA **S4** (8 mg, 5.69 μmol), palladium on carbon (5 mg, 4.70 μmol), and ammonium hydroxide (120 μl, 3.08 mmol) were dissolved in methanol (Volume: 1 mL) to give a black suspension. The solution was then purged with H<sub>2</sub> and stirred overnight under a positive H<sub>2</sub> atmosphere (balloon). The suspension was then filtered and washed multiple times with MeOH, followed by CHCl<sub>3</sub>. The material was purified via column chromatography, yielding **6** as a waxy solid (6 mg, 4.52 μmol, 79% yield). TLC (CHCl<sub>3</sub>:MeOH:*i*-PrNH<sub>2</sub>, 90:8:2 v/v): R<sub>f</sub> ≈ 0.3; <sup>1</sup>H NMR (400 MHz, CDCl<sub>3</sub>) δ 8.38 (s, 3H), 6.82 (t, *J* = 5.7 Hz, 3H), 3.70–3.55 (m, 42H), 3.49 (t, *J* = 5.1 Hz, 6H), 3.42 (t, *J* = 6.8 Hz, 6H), 2.84 (t, *J* = 5.2 Hz, 6H), 1.70–1.05 (m, 57H), 0.94 (d, *J* = 6.5 Hz, 9H); <sup>13</sup>C NMR (100 MHz, CDCl<sub>3</sub>) δ 165.9, 135.4, 128.3, 77.4, 73.4, 71.7, 70.8, 70.7, 70.7, 70.4, 70.2, 41.8, 38.6, 36.9, 36.7, 30.8, 29.9, 29.7, 29.7, 29.5, 27.0, 26.2, 19.7; MS (MALDI, *m/z*) [M+H]<sup>+</sup> calcd. for C<sub>72</sub>H<sub>139</sub>N<sub>6</sub>O<sub>15</sub>, 1328.03; found, 1328.03.

## Supplementary References

1. Leenders, C. M. A. *et al.* Supramolecular polymerization in water harnessing both hydrophobic effects and hydrogen bond formation. *Chem. Commun.* **49**, 1963–1965 (2013).
2. Albertazzi, L. *et al.* Spatiotemporal control and superselectivity in supramolecular polymers using multivalency. *Proc. Natl. Acad. Sci. U. S. A.* **110**, 12203–12208 (2013).
